# Supplementary material
Source: PubMed Central journal article supplement (PMC3079377)

# Figure OS1

## A

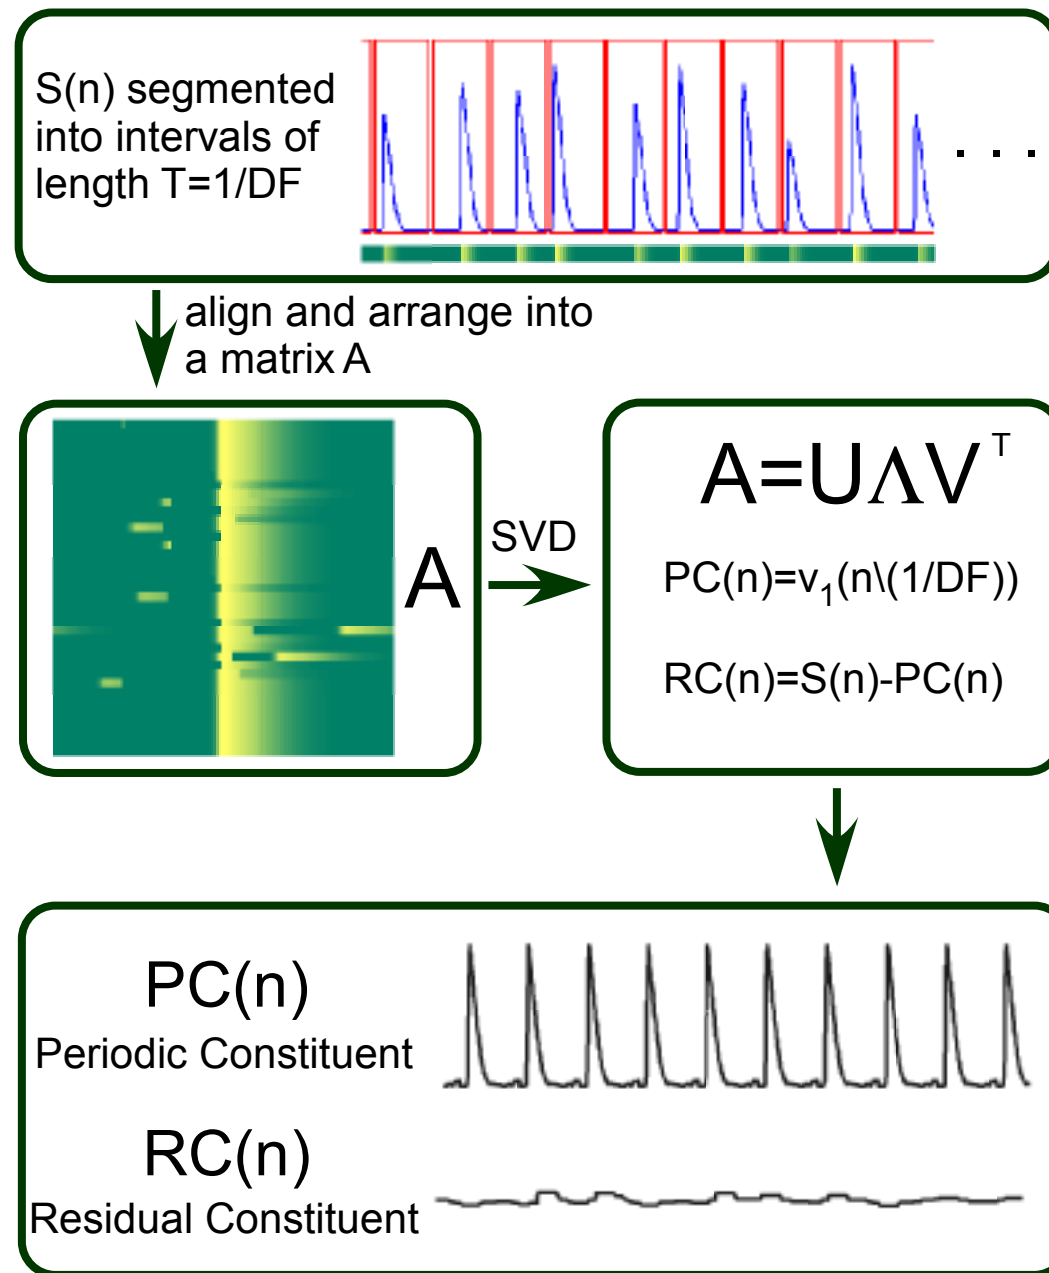

## B

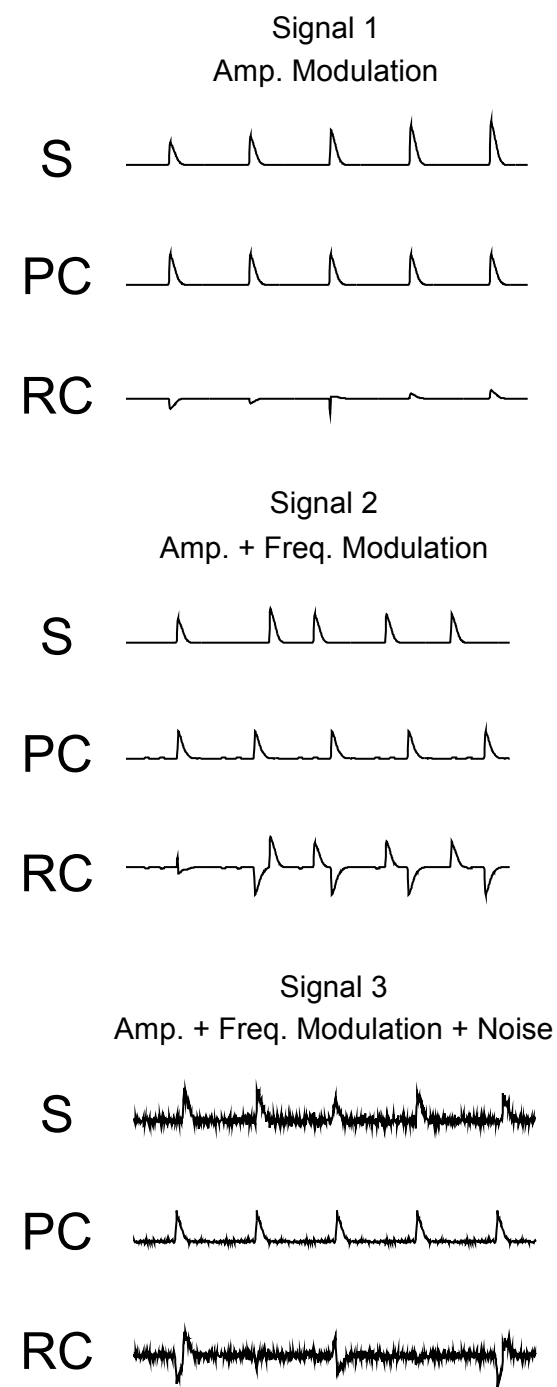

Figure OS2

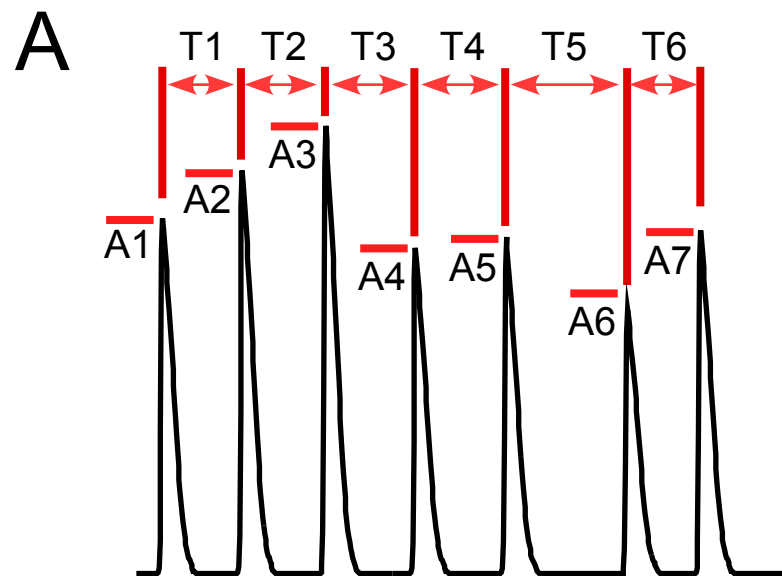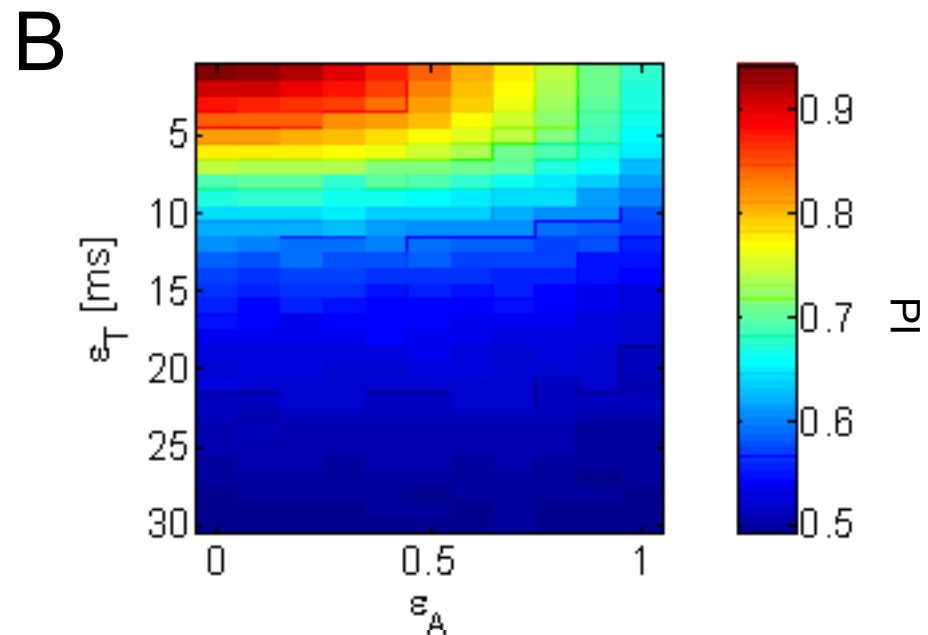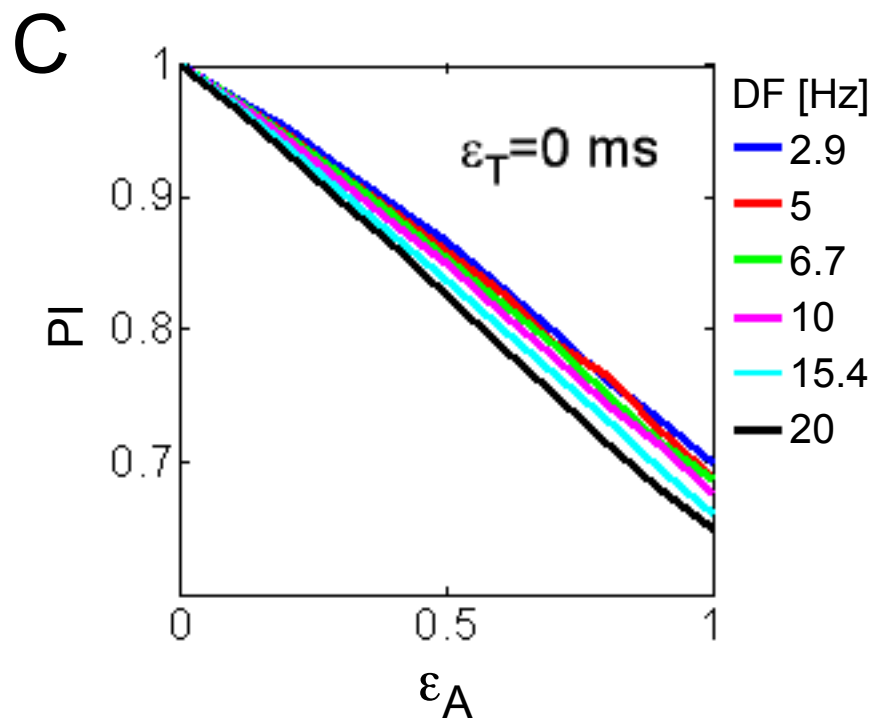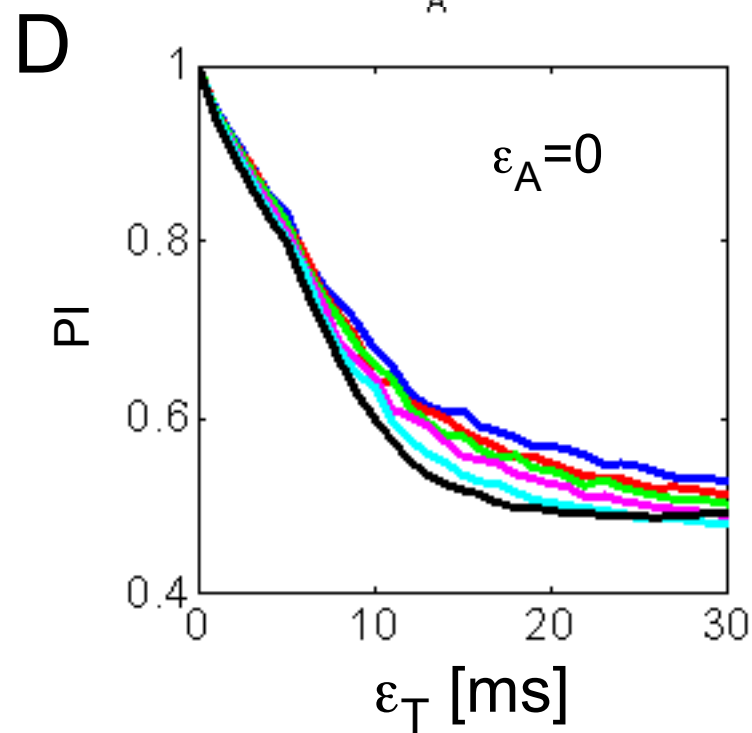

Figure OS3

Uniform model

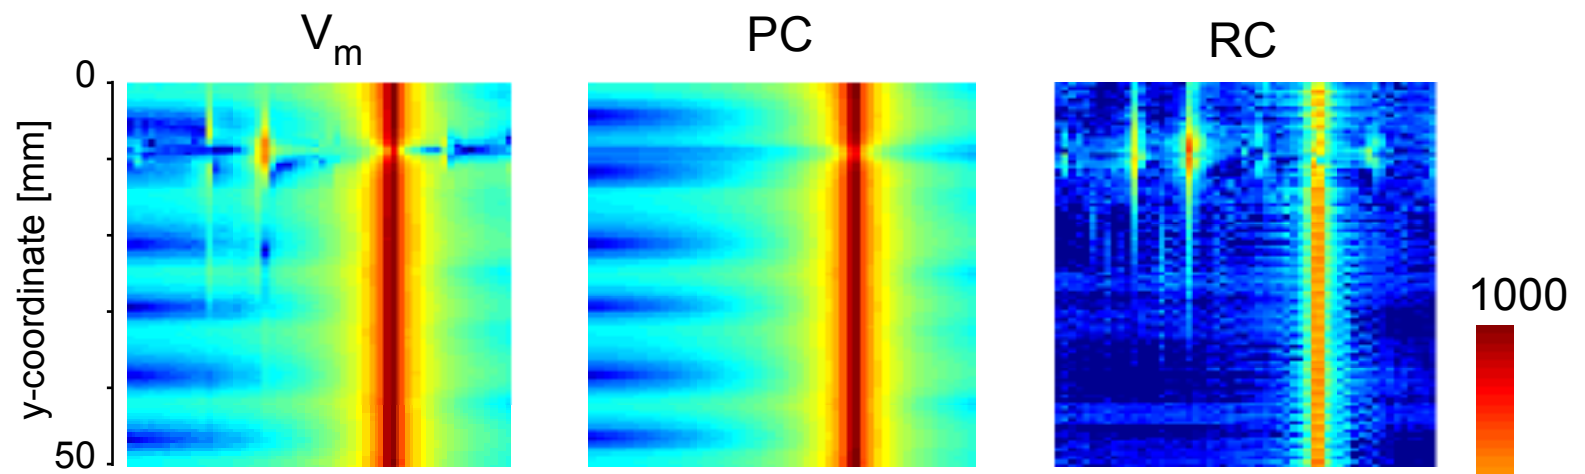

Non-uniform model

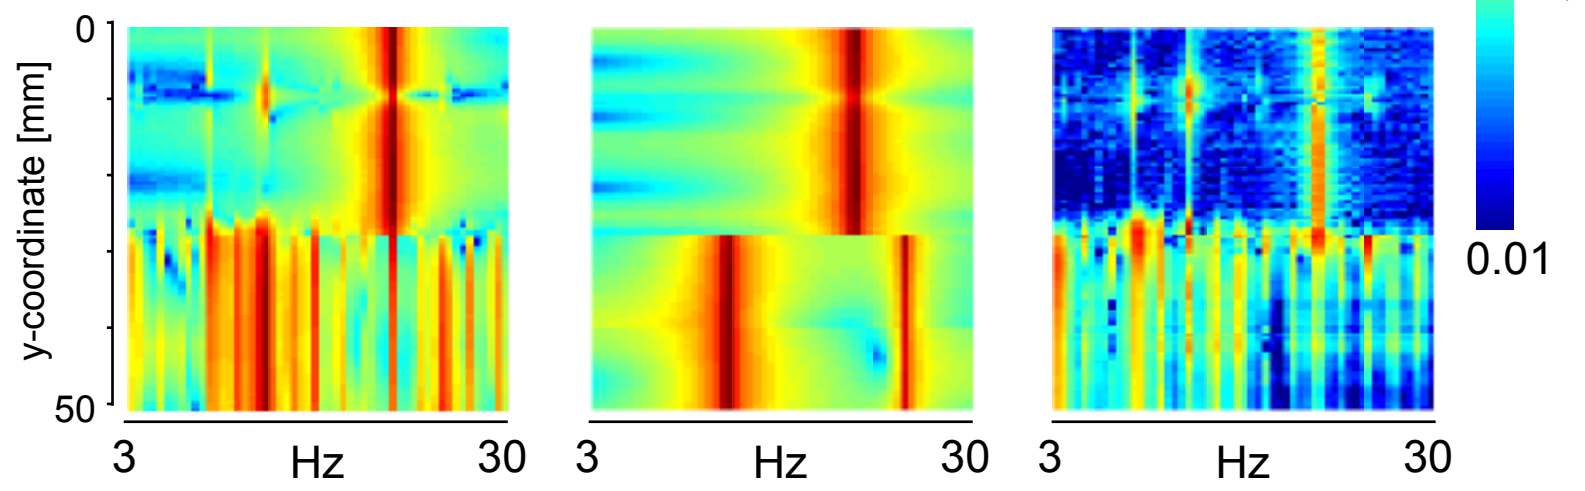

# Figure OS4

## A

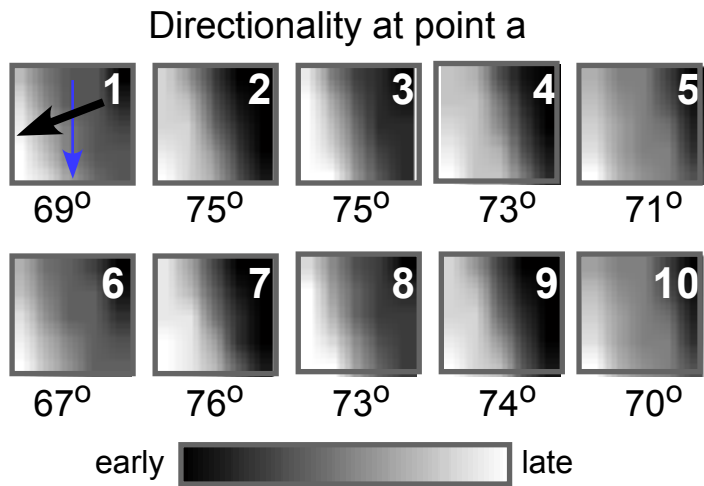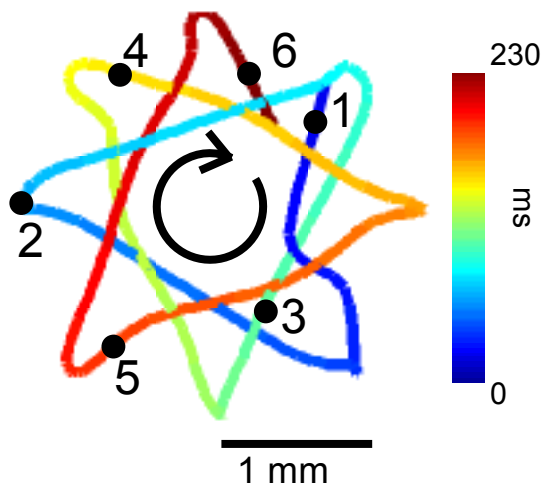

## B

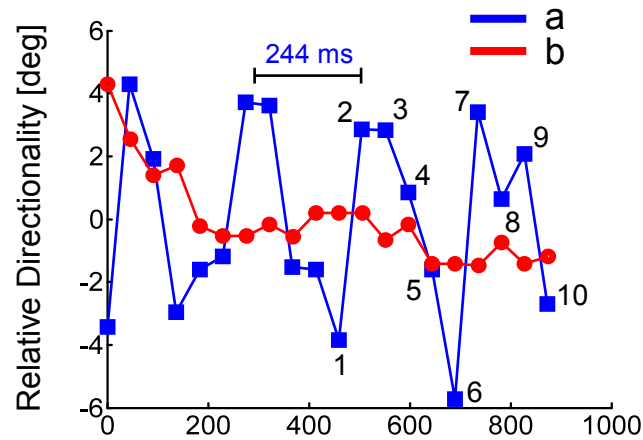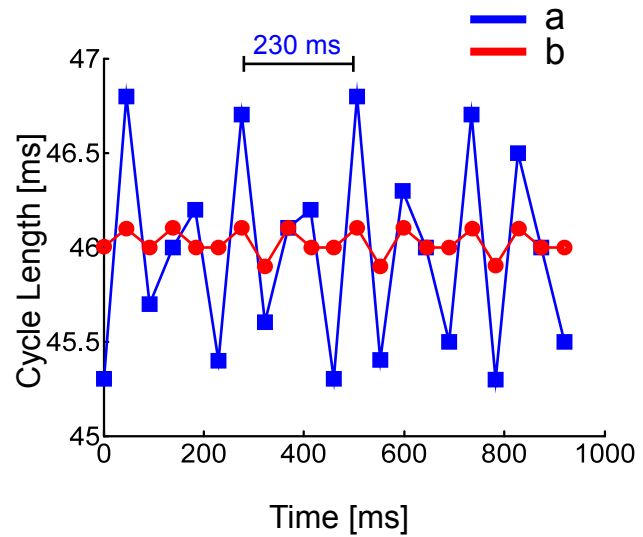

## C

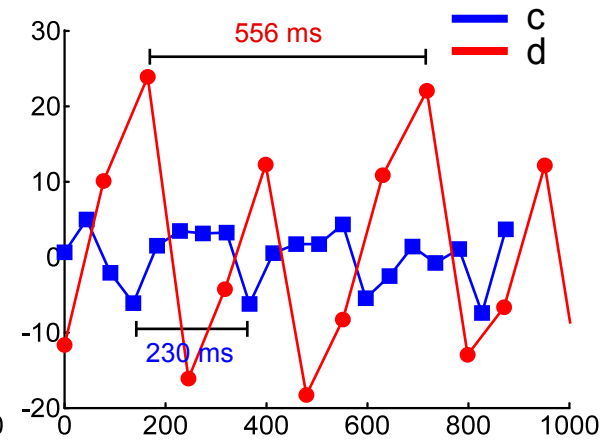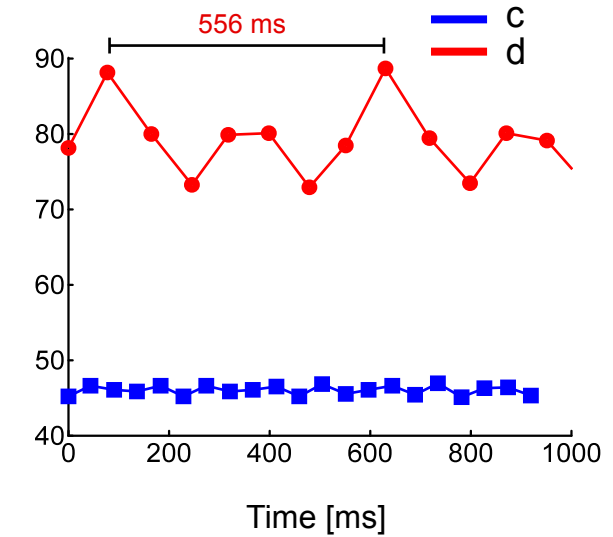

Figure OS5

A

PI maps

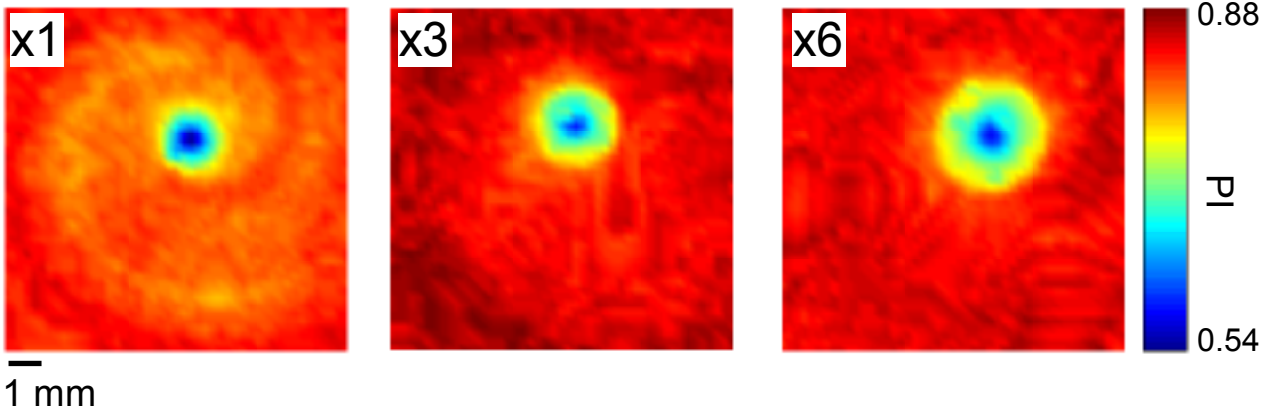

B

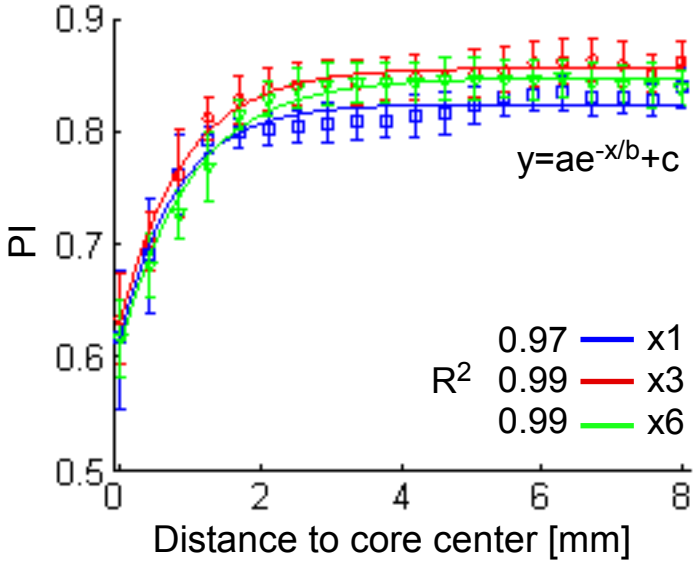

C

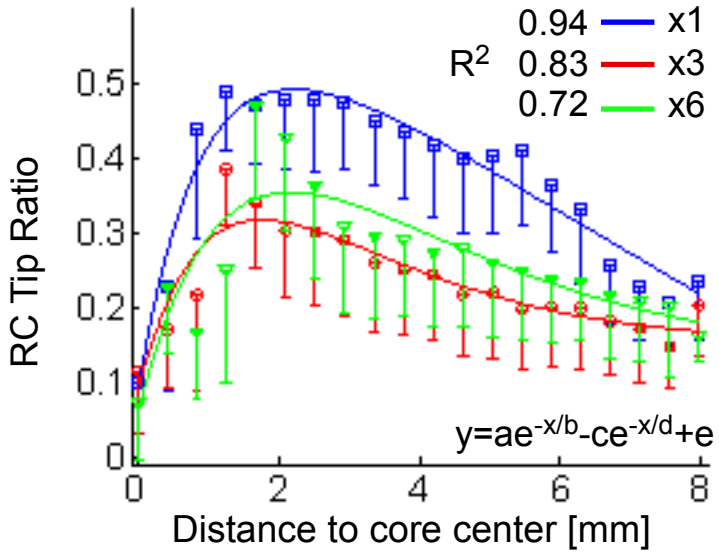

Figure OS6

A

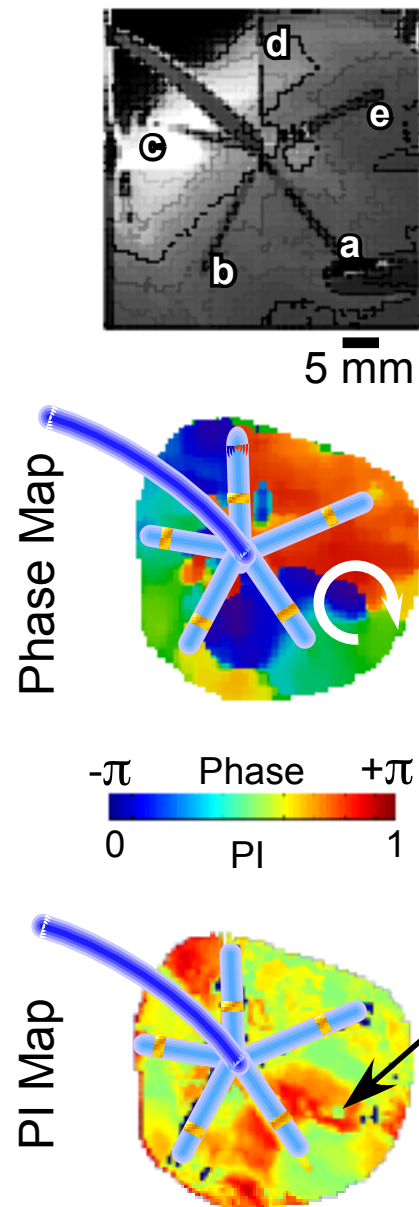

B

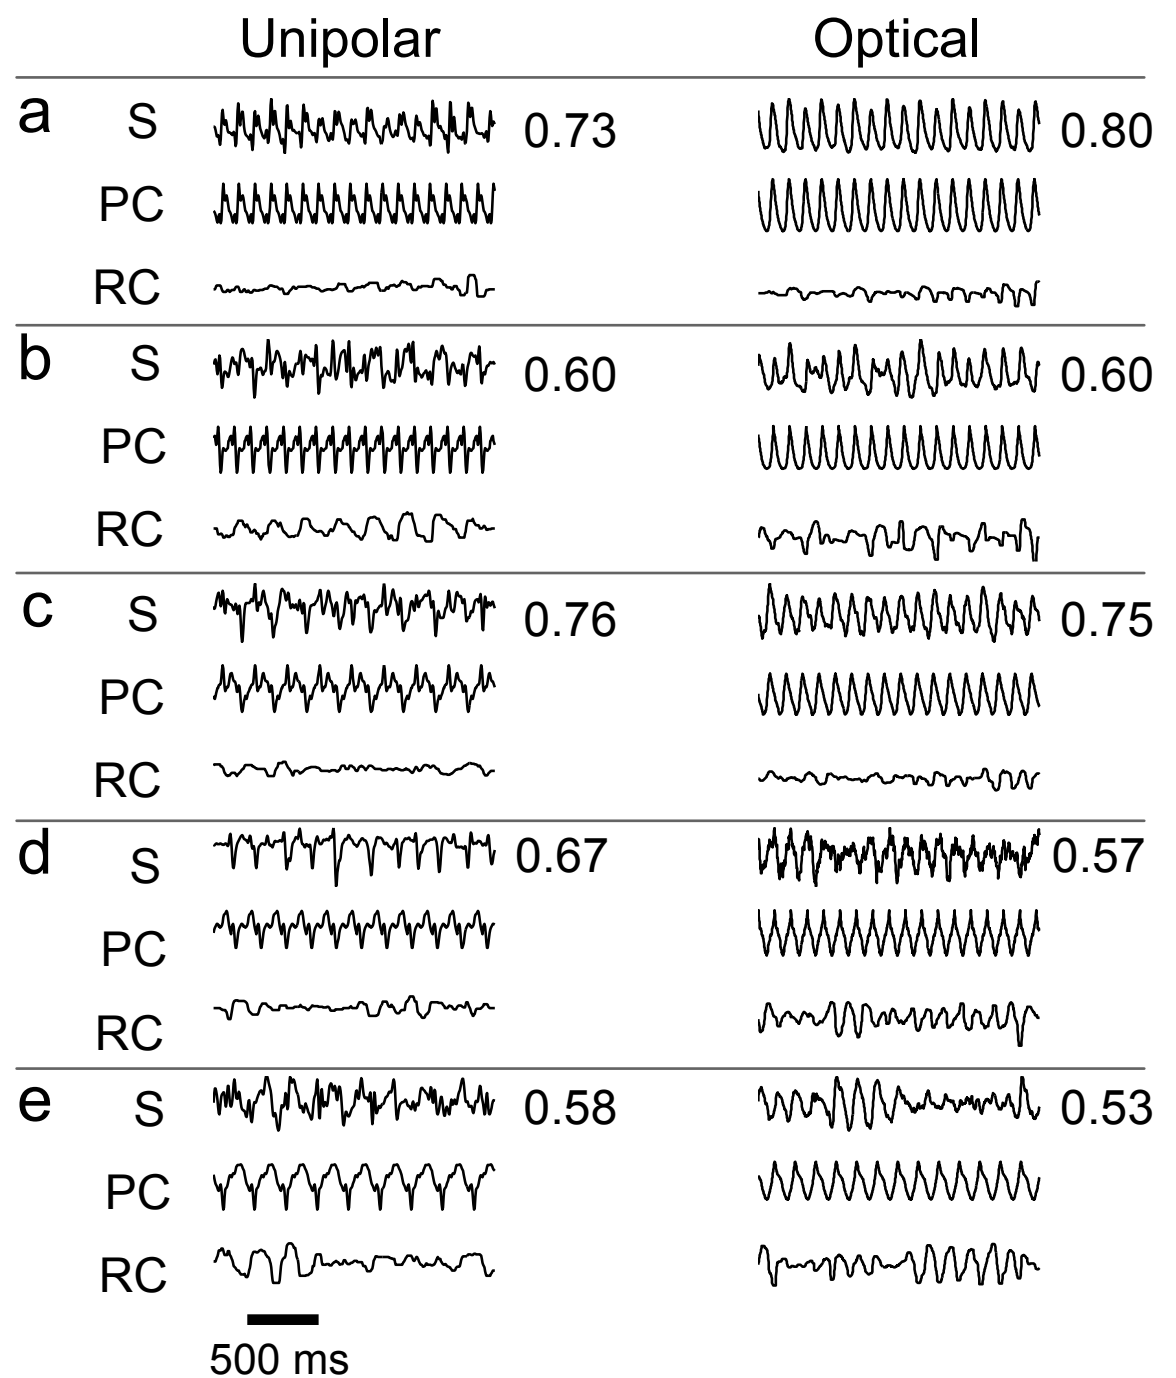

Figure OS7

A

Unipolar Electrograms  
Residual Constituent Power Spectra

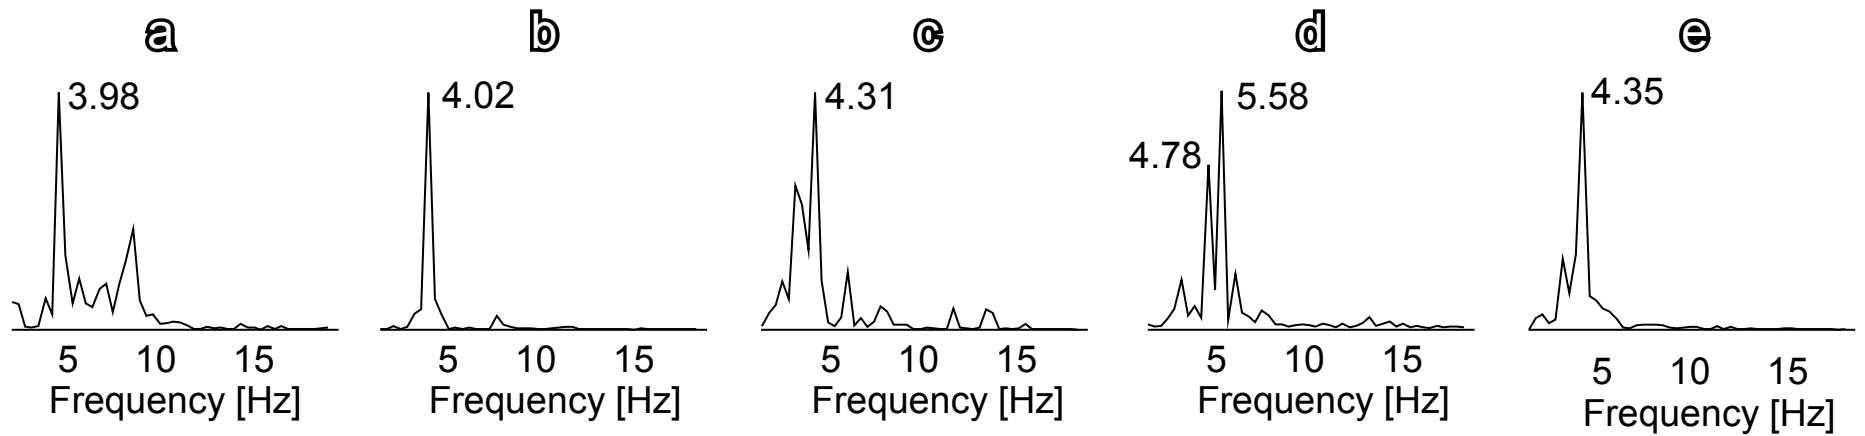

B

Spiral Tip  
Time-Space Trajectory

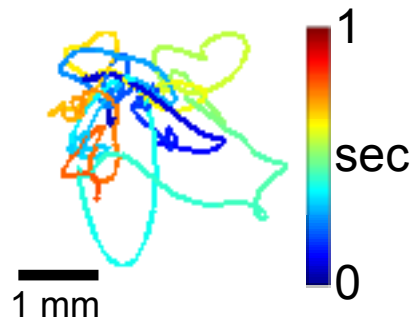

X-axis Tip Trajectory  
Power Spectrum

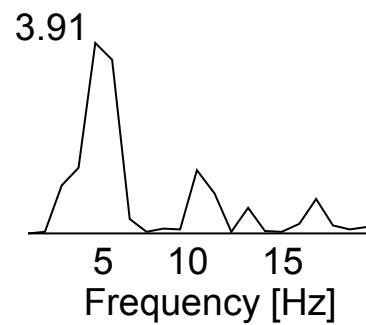

Y-axis Tip Trajectory  
Power Spectrum

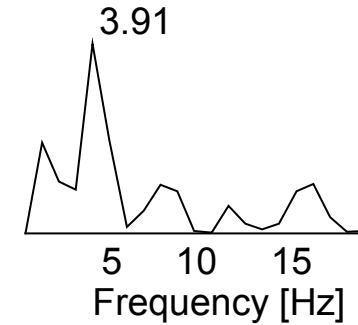

Figure OS8

A

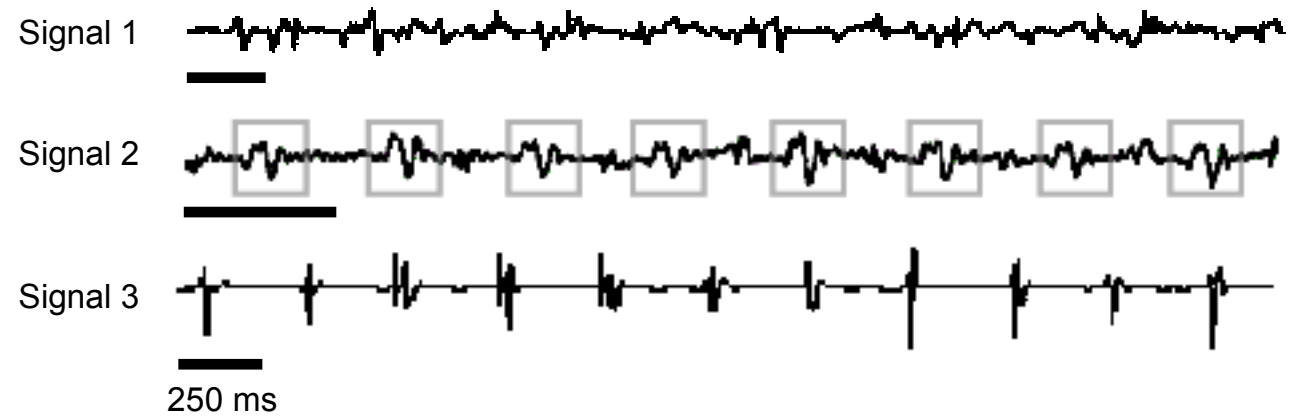

B

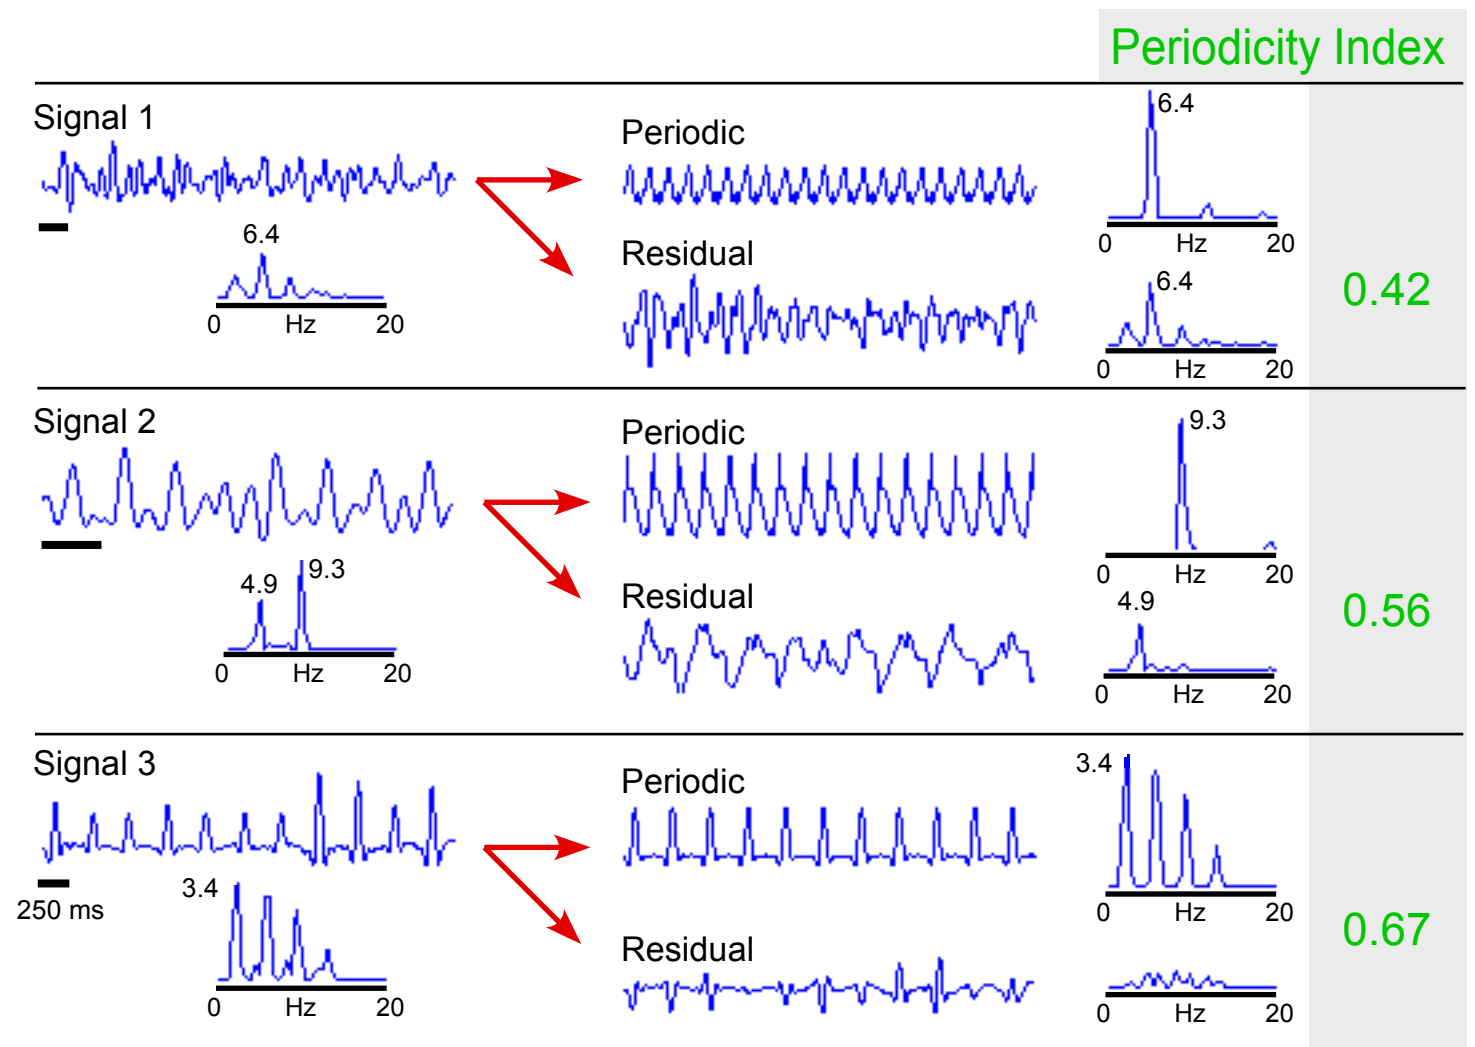

Supplement: NIHMS255804-supplement-Figures.pdf [file NIHMS255804-supplement-Figures.pdf]
